# Supplementary material
Source: MDPI journal article supplement (https://www.mdpi.com/2073-4344/13/2/322)
Supplement: s1 [file s1]

## **Supporting Information**

# **In Situ Electroplating of Ir@Carbon Cloth as High-Performance Selective Oxygen Evolution Reaction Catalyst for Direct Elec-trolytic Recovery of Lead**

Kai Che, Xiaoyang Zhu, Guangshi Tang, Man Zhao \* and Junqing Pan \*

*State Key Laboratory of Chemical Resources Engineering, College of Chemistry, Beijing University of Chemical Technology, Beijing 100029, China*

\*Correspondence: 2022500073@buct.edu.cn (M.Z.); jqpan@buct.edu.cn (J.P.)

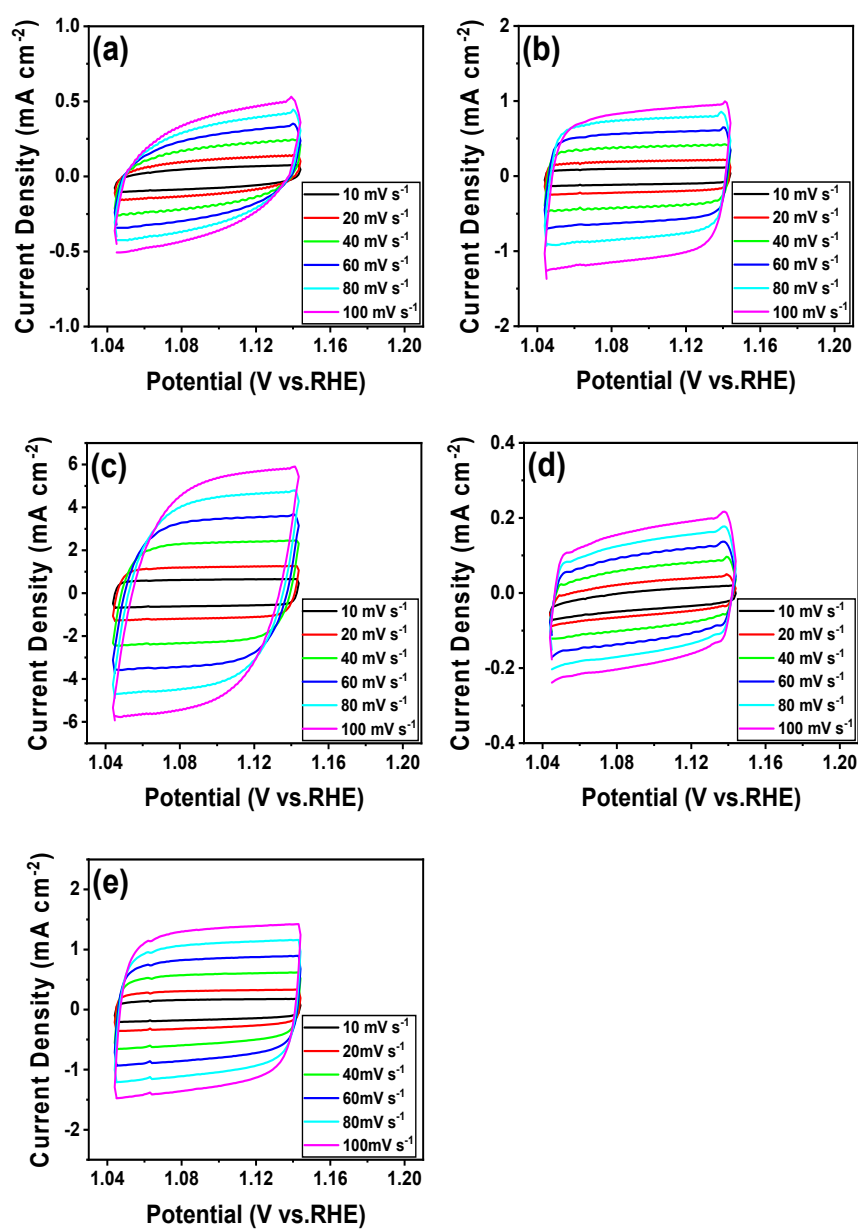

**Figure S1.** CV curves of CC-Ir at different sweep speeds obtained by electroplating at (a)  $25^\circ\text{C}$ , (b)  $75^\circ\text{C}$ , (c)  $85^\circ\text{C}$ , and (d)  $95^\circ\text{C}$  in 0.5 M MSA. (e) CV curves of Ir/C at different sweep speeds.

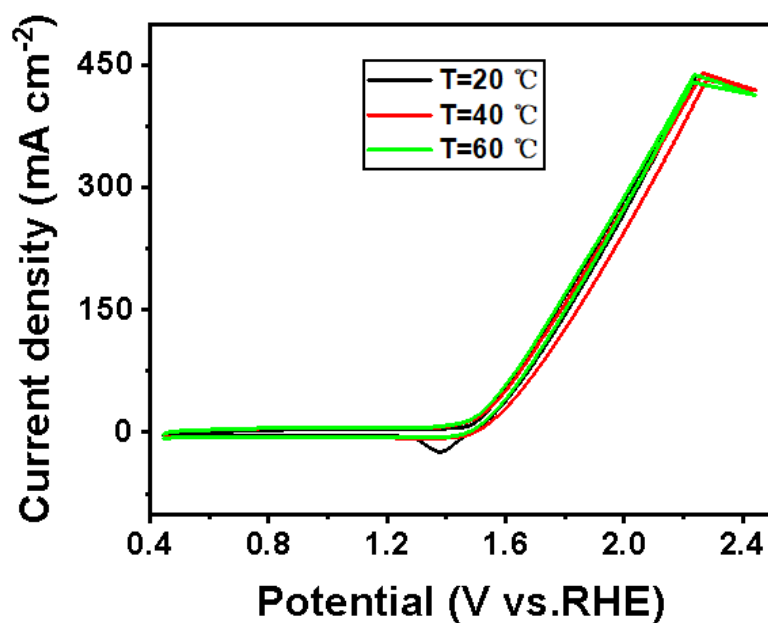

**Figure S2.** CV curves of CC-Ir in lead methanesulfonate electrolyte at different temperatures.

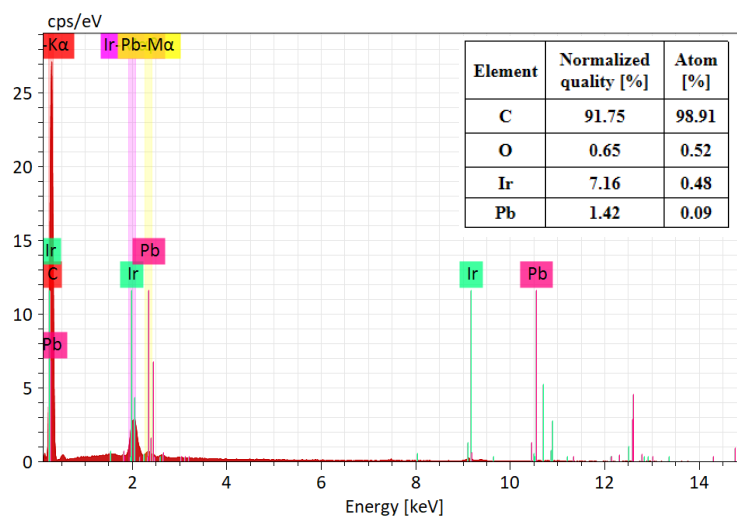

**Figure S3.** EDS of anodic product after electrolysis of 10 h in lead methanesulfonate electrolyte with CC-Ir.
